# Supplementary material for: Higher dietary intake of live microbes is inversely associated with accelerated biological aging
Source: Royal Society of Chemistry journal article supplement (doi:10.1039/d4fo04230a), 2025-01-01
Supplement: d4fo04230a1.pdf [file d4fo04230a1.pdf]

## Supplementary data

**Supplemental Table 1. Sensitivity analyses for the associations of dietary MedHi food intake with KDM-BA advancement and PA advancement**

|                    | $\beta$ (95% CI) by the dietary MedHi intake groups |                     |                      | <i>P</i> for trend |
|--------------------|-----------------------------------------------------|---------------------|----------------------|--------------------|
|                    | G1                                                  | G2                  | G3                   |                    |
| KDM-BA advancement | Reference                                           | -0.57 (-1.54, 0.40) | -1.38 (-2.17, -0.60) | 0.001              |
| PA advancement     | Reference                                           | -0.30 (-0.60, 0.00) | -0.68 (-0.97, -0.39) | < 0.001            |

The model was adjusted for age, gender, race, marriage, education, family monthly poverty level index category, smoking, alcohol consumption, physical activity, dietary energy intake, and history of hypertension, diabetes and cardiovascular disease.

KDM-BA, Klemera-Doubal method biological age; PA, phenotypic age;  $\beta$ , coefficient; CI, confidence interval.

**Supplemental Table 2. Sensitivity analyses for the associations of dietary MedHi intake with KDM-BA acceleration and PA acceleration**

|                                                            | Odds ratio (95% CI) by the dietary MedHi intake groups |                   |                   | <i>P</i> for trend |
|------------------------------------------------------------|--------------------------------------------------------|-------------------|-------------------|--------------------|
|                                                            | G1                                                     | G2                | G3                |                    |
| KDM-BA acceleration                                        |                                                        |                   |                   |                    |
| Adjustment for healthy eating index-2015 score             | Reference                                              | 0.87 (0.74, 1.02) | 0.84 (0.70, 0.99) | 0.096              |
| Excluding participants with hypertension, diabetes and CVD | Reference                                              | 0.79 (0.63, 0.99) | 0.72 (0.56, 0.93) | 0.014              |
| Excluding participants aged 80 and above                   | Reference                                              | 0.85 (0.72, 1.01) | 0.77 (0.65, 0.92) | 0.010              |
| PA acceleration                                            |                                                        |                   |                   |                    |
| Adjustment for healthy eating index-2015 score             | Reference                                              | 0.87 (0.71, 1.06) | 0.82 (0.71, 0.96) | 0.023              |
| Excluding participants with hypertension, diabetes and CVD | Reference                                              | 0.87 (0.67, 1.14) | 0.76 (0.60, 0.96) | 0.021              |
| Excluding participants aged 80 and above                   | Reference                                              | 0.85 (0.70, 1.03) | 0.71 (0.61, 0.83) | < 0.001            |

The model was adjusted for age, gender, race, marriage, education, family monthly poverty level index category, smoking, alcohol consumption, physical activity, dietary energy intake, and history of hypertension, diabetes and cardiovascular disease.

KDM-BA, Klemmera-Doubal method biological age; PA, phenotypic age; CI, confidence interval.
